# Supplementary material
Source: MDPI journal article supplement (https://www.mdpi.com/search?q=sustainability-14-05982)
Supplement: s001 [file sustainability-14-05982-s001.zip]

## Sheet: Sheet1
Table S1. Pooled mean performance of forty-three genotypes of lentil for eleven characters
S. No.	Genotypes	DTF	DTM	PH	NPP	NPB	NFB	SP	HSW	BY	HI	SY
1	RVL 11-6	76	119.33	43.5	103.07	3.37	15.2	1.8	2.37	2.588	34.23	0.834
2	RVL 13-5	76.67	124.83	49.67	104.37	3.03	16.9	1.53	3.05	3.182	33	0.99
3	RVL 31	75.33	119.5	40.7	123.2	2.77	15.67	1.63	2.49	2.423	32.23	0.743
4	RVL 13-7	75.67	120.17	29.03	83.53	2.53	15.77	1.32	2.53	1.991	31	0.606
5	JL 3	75	120.67	36.3	90.27	2.87	14.47	1.6	2.41	2.631	31.5	0.809
6	HUL 57	77.33	125.5	44.9	117.63	2.9	19.3	1.93	1.82	3.408	34	1.112
7	Kota Masoor-2	74.67	124.67	44.43	113	3.27	16.13	1.7	2.35	3.205	40.03	1.244
8	Kota Masoor-1	75.83	125	44.57	112.9	2.73	15.87	1.62	2.39	3.328	37.57	1.197
9	RLG 5	77.67	126.5	53.6	117.67	3.07	15.63	1.53	2.62	3.638	33.4	1.17
10	L 4727	75.83	117.17	42.73	88.7	2.53	13.7	1.45	2.42	2.866	29.53	0.817
11	L 4717	74.33	112.33	27.67	89.27	2.63	11.27	1.6	1.79	2.201	44.23	0.955
12	L 4147	84.67	125	41.23	121.07	3.17	18.17	1.83	1.72	3.855	31.07	1.186
13	L 4076	78	125.33	41.57	120.33	2.87	16.33	1.62	2.65	3.599	32.63	1.137
14	LH 89-48	81	124.5	41.5	95.67	2.8	11.9	1.72	1.86	2.881	37.5	1.055
15	LH 84-8	82.67	126.33	49.97	118.73	3.07	18.27	1.57	2.24	3.533	37.57	1.29
16	LH 82-6	84.17	126.67	52.07	107	3.03	15.6	1.7	2.67	3.79	34.83	1.28
17	LL 699	85.5	126.17	46.83	114.37	3.3	17.37	1.58	2.21	3.563	37	1.293
18	LL 1373	79.33	124	40.83	112.23	2.53	20.6	1.52	3.5	3.563	29.9	0.986
19	LL 931	81.83	127.5	48.97	115.6	2.57	15.4	1.83	2.68	4.096	28.9	1.128
20	DPL 15	78.5	128.17	49	114.97	2.9	16.93	1.72	2.72	3.996	31.7	1.162
21	DPL 62	79.33	127.17	42.9	105.7	2.97	20.17	1.6	3.13	3.935	31.87	1.18
22	IPL 81	80.17	127.67	52.03	127.2	2.93	18.23	1.88	2.63	3.905	33.13	1.216
23	IPL 406	78.33	125.83	49.07	97.47	2.7	13.47	1.28	3.3	3.562	32.8	1.131
24	IPL 316	78.5	127.33	45.67	139.87	3.07	18.03	1.78	2.53	3.972	36.03	1.373
25	IPL 220	75	123.5	40.73	112.03	3.1	15.67	1.72	1.73	3.584	34.73	1.209
26	WBL 77	73	119.83	39.3	109.07	2.73	13.77	1.85	1.85	2.82	38.73	1.085
27	Pant L -7	75.83	121	40.67	131.1	2.87	15.27	1.25	2.8	2.989	37.63	1.071
28	Pant L -8	85.5	123.17	43.23	131.73	3.07	17.8	1.85	1.7	3.447	37.33	1.242
29	Narender Masoor 1	78	125.83	38.5	113.1	2.87	16.73	1.75	2.22	3.292	34.1	1.071
30	Narender Masoor 2	81.5	125.5	42.73	107.5	2.93	14.63	1.92	1.71	3.141	34.23	1.055
31	LH 16-01	82.5	124.17	45.9	110.2	2.87	17.9	1.7	2.4	2.7	34.7	0.864
32	LH 17-16	82.83	125.83	45.23	113.1	2.77	17.2	1.88	2.45	2.885	36.2	1.004
33	LH 17-17	81	127.33	50.83	129.47	3.13	15.4	1.3	2.5	3.096	38.1	1.154
34	LH 17-18	80.67	125.5	48.37	127.57	3.07	15.37	1.42	2.58	2.796	39.8	1.082
35	LH 17-19	81.67	126.5	51.07	140.1	3.53	15.7	1.85	2.54	3.3	40.4	1.301
36	LH 18-04	80.67	125.67	50.3	127.13	3.47	15.5	1.48	2.43	3.171	43.53	1.346
37	LH 18-05	81.67	127	52.37	125.67	2.9	17.47	1.52	2.66	3.266	29.17	0.936
38	Pant Lentil 1	76.17	126.5	39.77	95.3	2.9	12.63	1.47	2.55	2.823	29.9	0.844
39	PL 02	75.83	127.83	42.47	110.63	2.37	14.4	1.5	2.66	2.803	30.53	0.825
40	PL 04	79.67	121.5	41.27	118.87	2.67	16	1.68	2.65	3.058	35.77	1.06
41	Precoz	80.67	122.67	29.87	108.63	2.73	12.13	1.67	3.39	2.593	31.47	0.811
42	IPL 315	78.67	125.83	42.57	112.17	2.93	14.47	1.5	2.31	3.592	33.03	1.158
43	DPL 58	80.83	123.17	47.3	115	3.53	17.1	1.78	2.74	3.557	31.3	1.074
	Mean	79	124.3	44	113.3	2.93	15.9	1.64	2.46	3.224	34.6	1.072
